# Supplementary material
Source: ML conference proceedings conference paper supplement (https://www.ecva.net/papers/eccv_2020/papers_ECCV/html/123520375_ECCV_2020_paper.php)
Supplement: Supplementary file 7 [file 123520375-supp.zip]

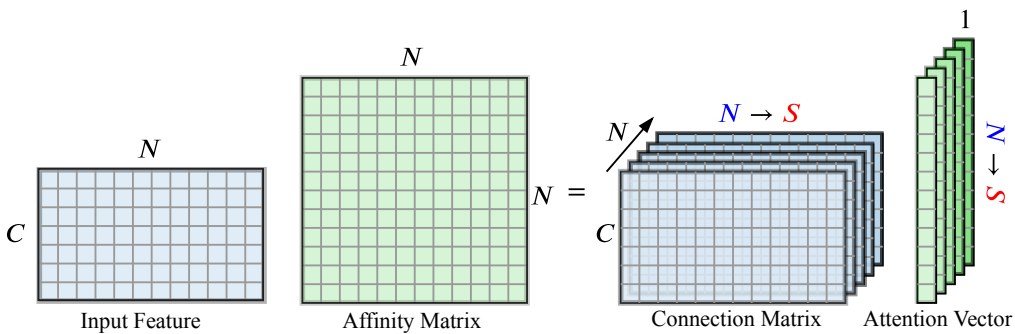

$$\mathcal{R}^{C \times N} \times \mathcal{R}^{N \times N} \rightarrow \underbrace{\mathcal{R}^{C \times N} \times \mathcal{R}^{N \times 1}}_{=N} \rightarrow \underbrace{\mathcal{R}^{C \times S} \times \mathcal{R}^{S \times 1}}_{=N}$$
