# Supplementary material
Source: ML conference proceedings conference paper supplement (https://www.ecva.net/papers/eccv_2020/papers_ECCV/html/123520375_ECCV_2020_paper.php)
Supplement: Supplementary file 8 [file 123520375-supp.zip]

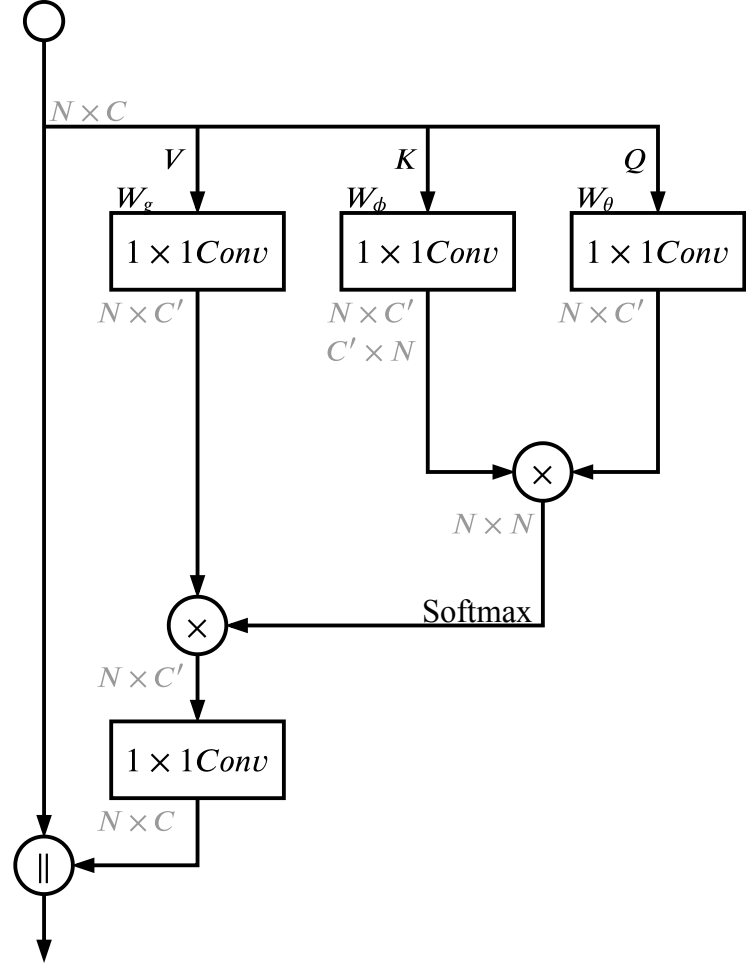

(a) Non-local block

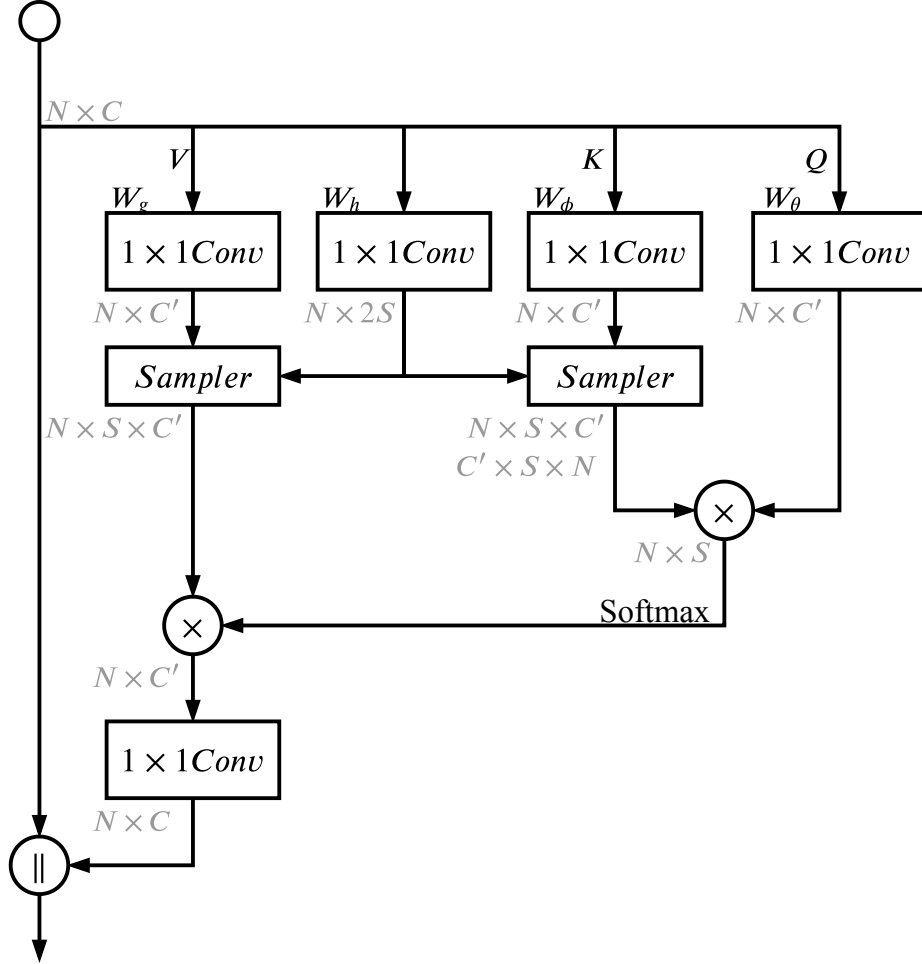

(b) Simple Representative Graph layer

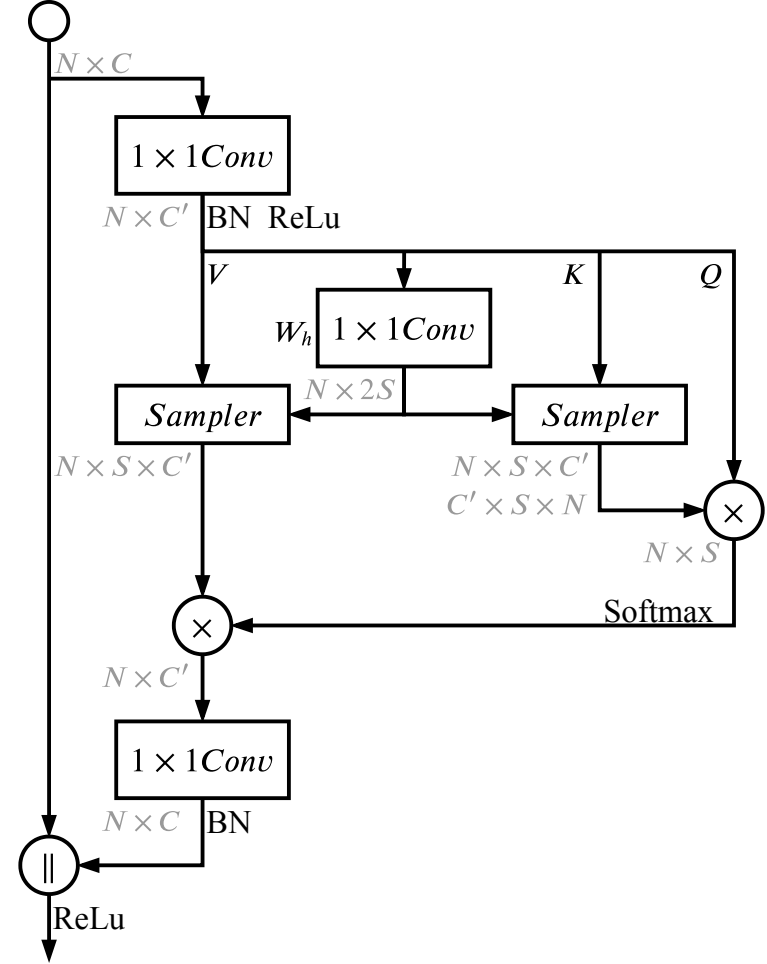

(c) Bottleneck Representative Graph layer
