# Supplementary material
Source: ML conference proceedings conference paper supplement (https://www.ecva.net/papers/eccv_2020/papers_ECCV/html/123520375_ECCV_2020_paper.php)

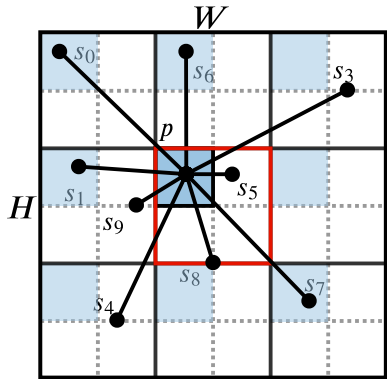

$\xrightarrow{\text{Sample}}$

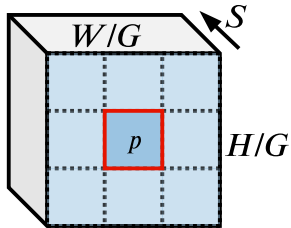

Supplement: Supplementary file 3 [file 123520375-supp.zip]

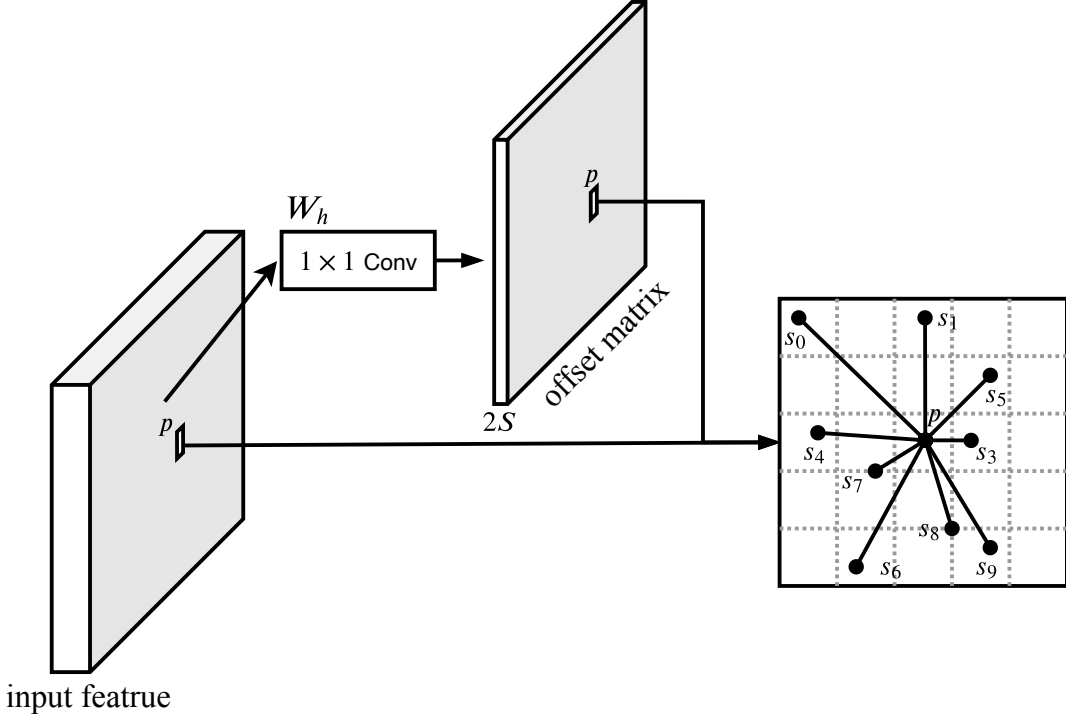

Supplement: Supplementary file 6 [file 123520375-supp.zip]

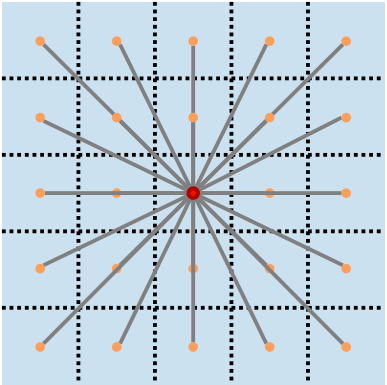

Supplement: Supplementary file 9 [file 123520375-supp.zip]

# Histogram of Affinity Matrix

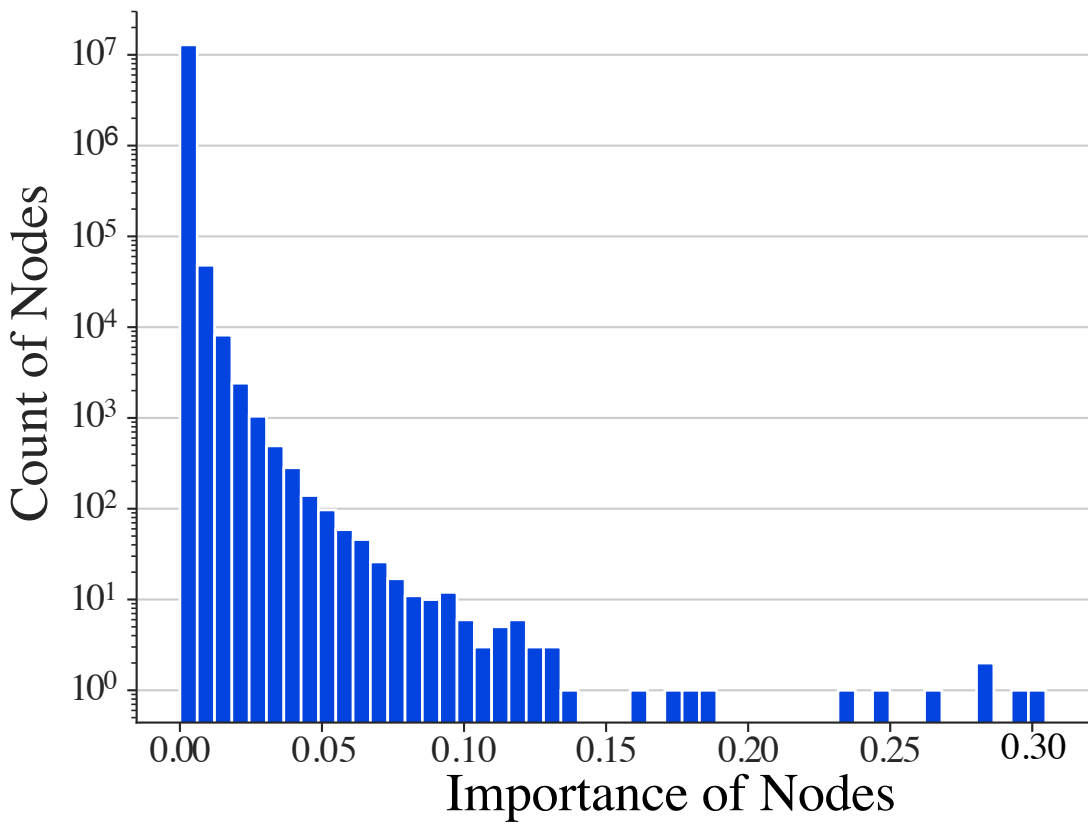

Supplement: Supplementary file 10 [file 123520375-supp.zip]

Value RepFeature  
 $S$

Key RepFeature  
 $C$

Query Feature  
 $N$

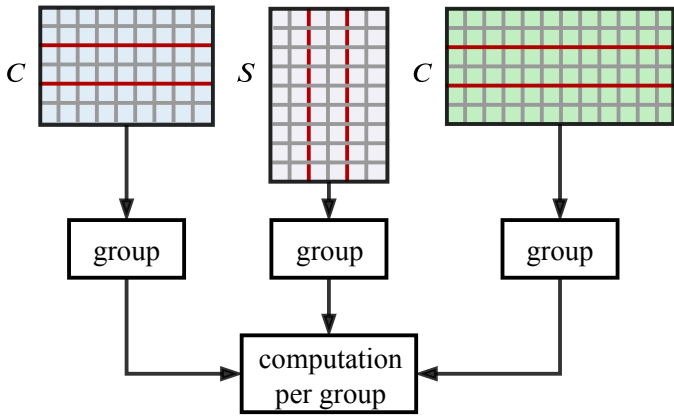

Supplement: Supplementary file 13 [file 123520375-supp.zip]

# Histogram of Attention Vector

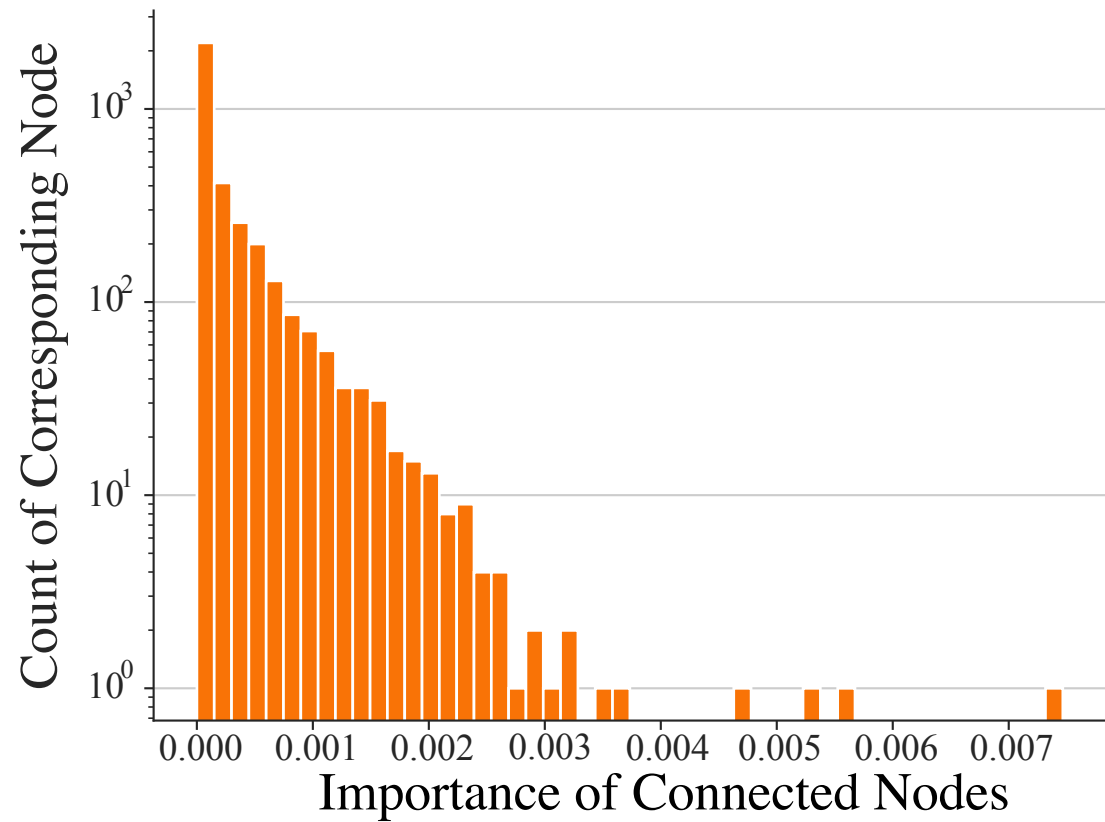

Supplement: Supplementary file 14 [file 123520375-supp.zip]

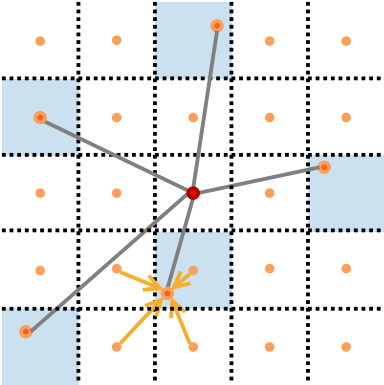

Supplement: Supplementary file 21 [file 123520375-supp.zip]
